# Supplementary material for: Impact of COVID-19 and Associated Preventive Measures on Cardiometabolic Risk Factors in South Korea
Source: PubMed Central journal article supplement — J Obes Metab Syndr. 2021 Aug 2;30(3):248–60. doi: 10.7570/jomes21046 (PMC8526291; doi:10.7570/jomes21046), 2021-08-02
Supplement: jomes-30-3-248-supple.pdf [file jomes-30-3-248-supple.pdf]

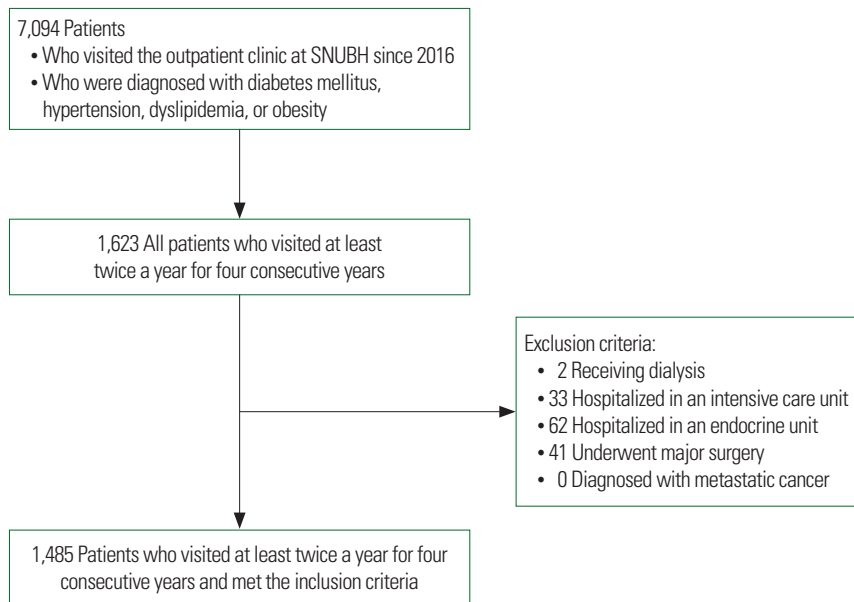

**Supplementary Figure 1.** Flowchart of study population selection. SNUBH, Seoul National University Bundang Hospital.
